# Supplementary material for: The anti-angiogenic tyrosine kinase inhibitor Pazopanib kills cancer cells and disrupts endothelial networks in biomimetic three-dimensional renal tumouroids
Source: PubMed Central journal article supplement (PMC7238304; doi:10.1177/2041731420920597), 2020-05-18
Supplement: Supplementary_figures_Stamati_et_al.pdf [file Supplementary_figures_Stamati_et_al.pdf]

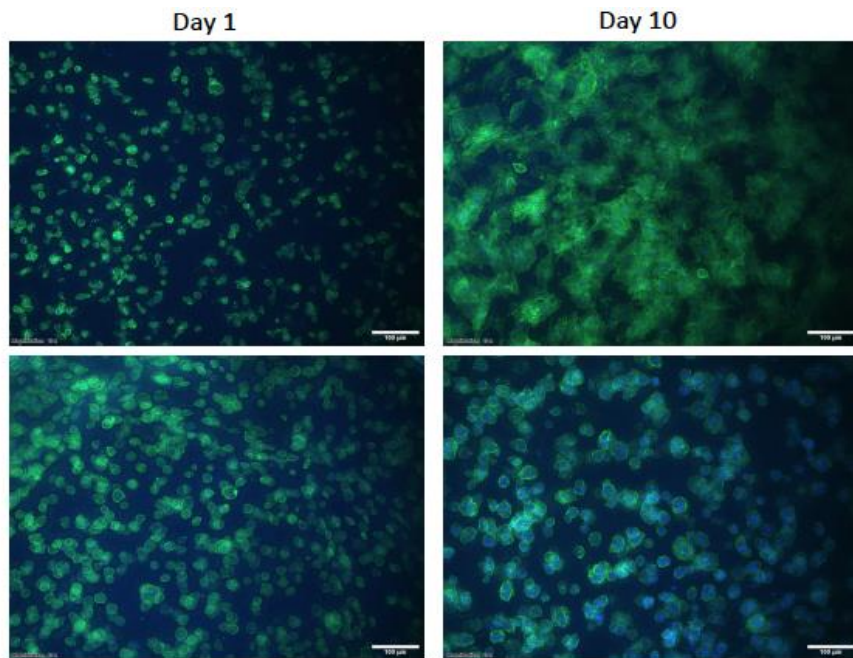

1  
2  
3  
4  
5  
6  
7  
8  
9  
10  
11  
12  
13  
14  
15  
16  
17  
18  
19  
20  
21  
22  
23

**Supplementary figure 1:** Tumouroids on day 1 and day 10 of culture in 786-O (upper panel) and CAKI-2 lower panel. On day 1 tumouroids have single cells and on day 10 cells have formed spheroids/ cell aggregates. Phalloidin staining, DAPI counterstain, scale bar= 100µm

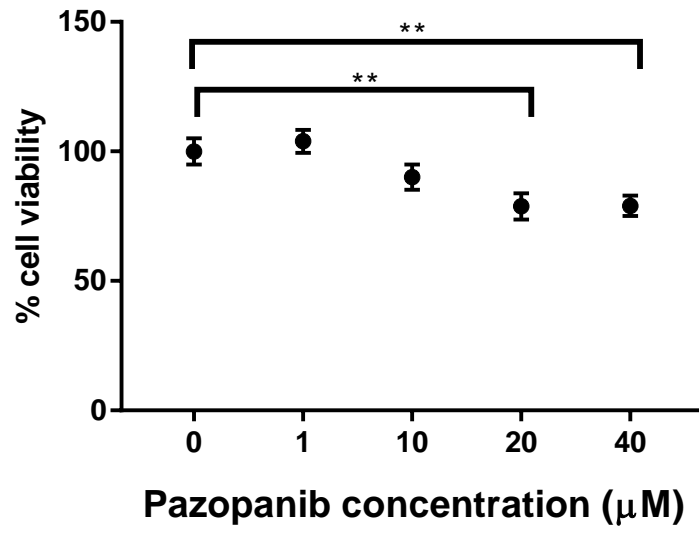

Supplementary figure 2: 786-O simple tumouroids treated on day 1 for 48hours with Pazopanib.

24  
25  
26  
27  
28  
29  
30  
31  
32  
33  
34  
35  
36  
37  
38  
39  
40  
41  
42  
43  
44  
45  
46  
47  
48  
49

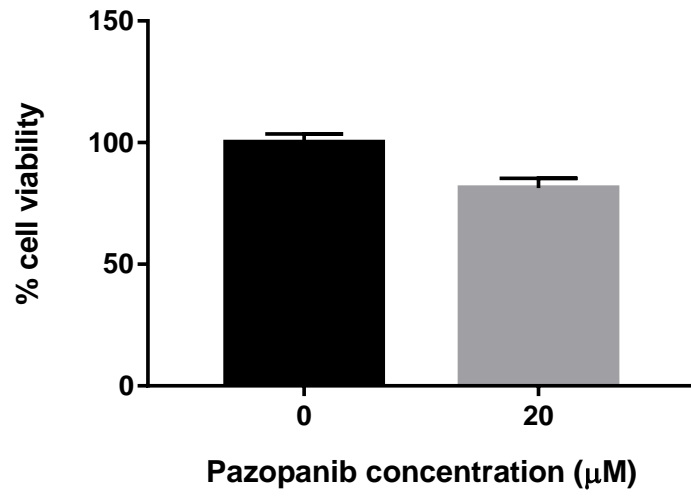

50

51 Supplementary figure 3: Complex tumouroids with 786-O, HUVEC and HDF cells treated for 120 hours with  
52 Pazopanib. No significant decrease in cell viability was observed.

53

54

55

56

57

58

59

60

61

62

63

64

65

66

67

68

69

70

71

72

73

74

75

76

77  
78  
79  
80

Control

Treated

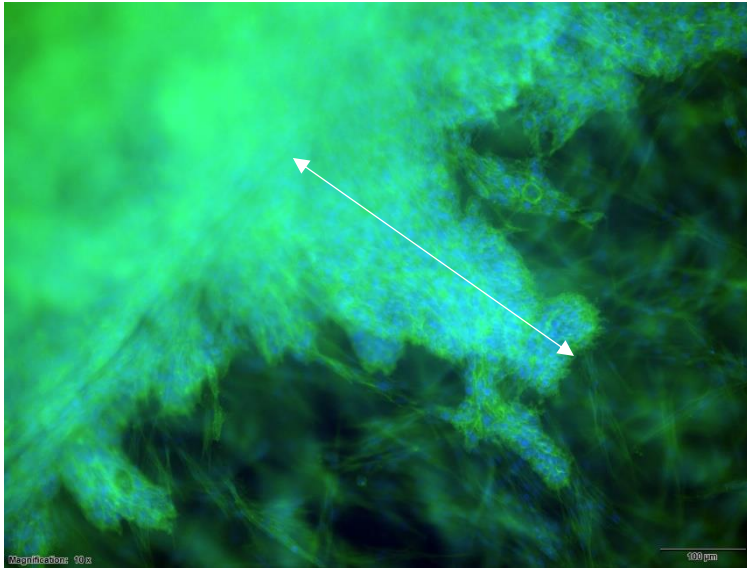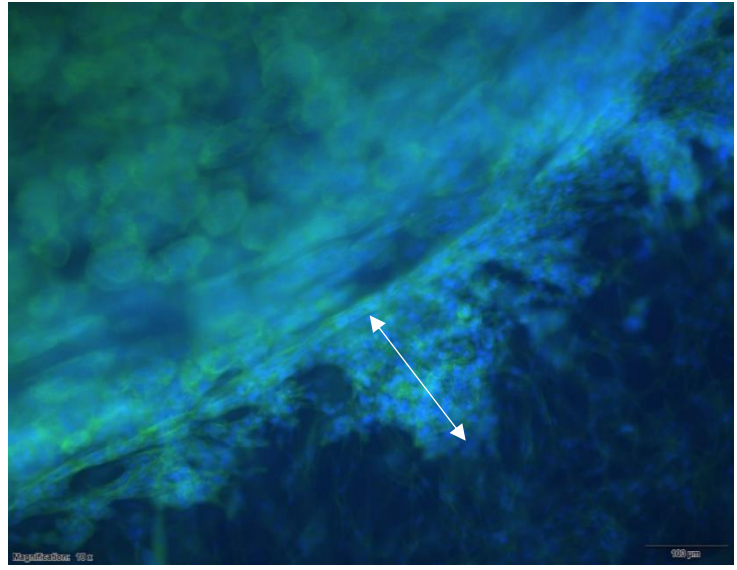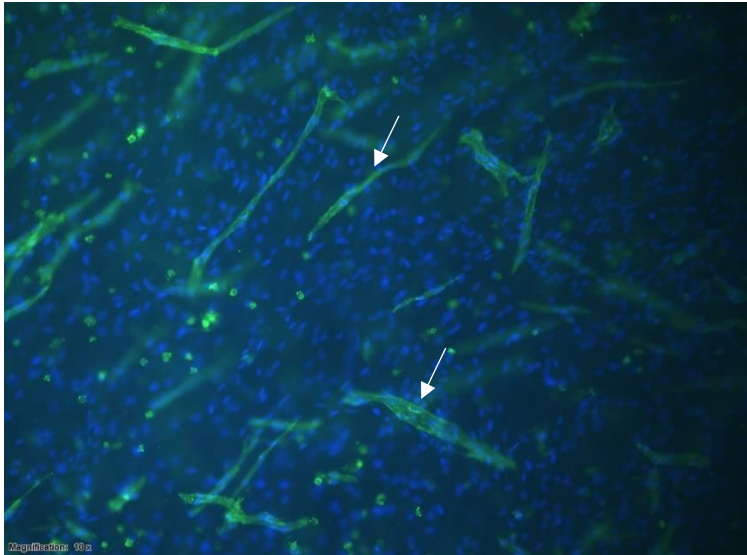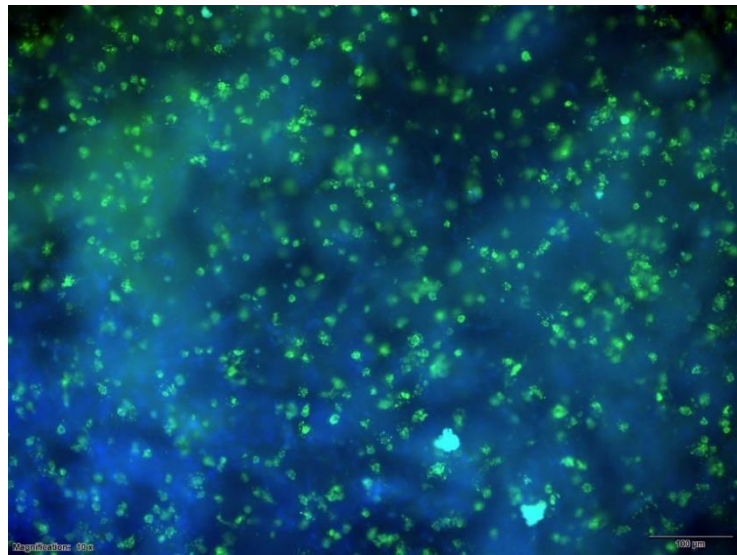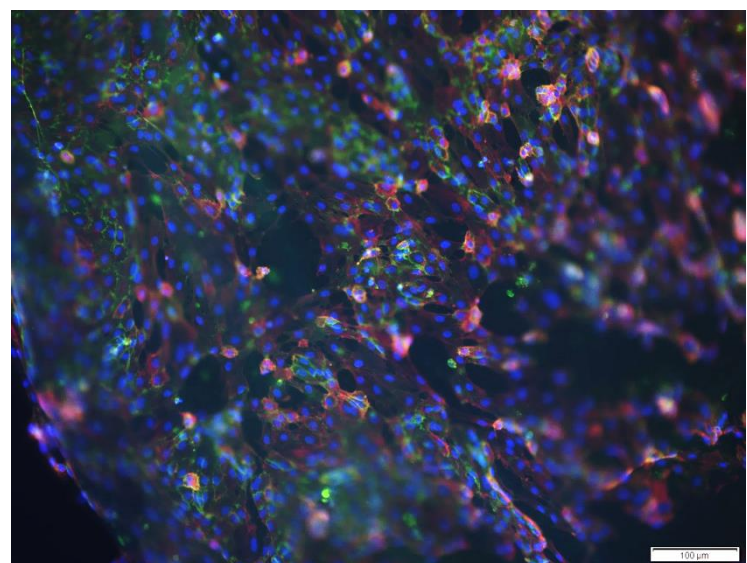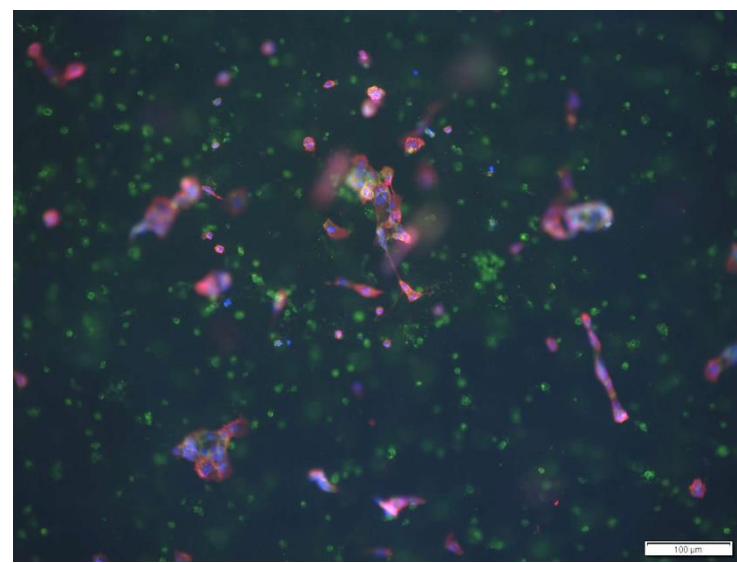

Supplementary figure 4: Immunofluorescence images of complex tumouroids, controls and treated. A, B) Invasion of 786-O cells into the stroma C,D) endothelial cell networks , E,F) Endothelial cells in HUVEC only control cultures
